# Supplementary material for: Water cluster supported architecture of lanthanide coordination polymers with pyrazinetricarboxylic acid
Source: Royal Society of Chemistry journal article supplement (doi:10.1039/b810964h), 2008-11-05
Supplement: b810964h.pdf [file b810964h.pdf]

## Supporting information

STable 1 Hydrogen bond geometry of complexes **1** and **3**(Å, °)

| Complex  | D-H    | d(D-H) | d(H...A) | <DHA | d(D..A)   | A                      |
|----------|--------|--------|----------|------|-----------|------------------------|
| <b>1</b> | O8-H8A | 0.85   | 1.92     | 171  | 2.759 (8) | O5 [-x+1, -y+2, -z+1 ] |
|          | O9-H9A | 0.85   | 2.01     | 170  | 2.851(8)  | O5 [x+1, y, z ]        |
|          | O6-H6A | 0.85   | 2.41     | 117  | 2.899(5)  | O4 [-x+1, -y+1, -z+1 ] |
|          | O7-H7A | 0.85   | 2.46     | 113  | 2.904(9)  | O7 [-x+1, -y+1, -z ]   |
|          | O6-H6B | 0.85   | 2.17     | 124  | 2.738(6)  | O9                     |
|          | O7-H7B | 0.85   | 1.89     | 166  | 2.724(6)  | O8 [x, y-1, z ]        |
|          | O8-H8B | 0.85   | 1.95     | 175  | 2.799(7)  | O2 [-x+1, -y+2, -z ]   |
|          | O8-H8B | 0.85   | 2.47     | 126  | 3.046(8)  | O1 [-x+1, -y+2, -z ]   |
|          | O9-H9B | 0.85   | 1.98     | 175  | 2.832(8)  | O2 [x+1, y, z+1 ]      |
| <b>3</b> | O7-H7A | 0.85   | 2.04     | 155  | 2.829(4)  | O2                     |
|          | O7-H7B | 0.85   | 2.37     | 116  | 2.842(5)  | O6 [-x, -y, -z+1 ]     |
|          | O7-H7B | 0.85   | 2.37     | 116  | 2.842(5)  | O6 [-x, y+1/2, -z+1 ]  |
|          | O6-H6B | 0.85   | 2.42     | 138  | 3.104(4)  | N2 [ x-1, y, z ]       |
|          | O6-H6A | 0.85   | 2.50     | 109  | 2.897(4)  | O6 [-x, -y, -z+1 ]     |
